# Supplementary material
Source: Springer Nature journal article supplement (https://www.springermedizin.de/resource/supplementary/12916_2006_127_MOESM4_ESM.pdf/9599228)

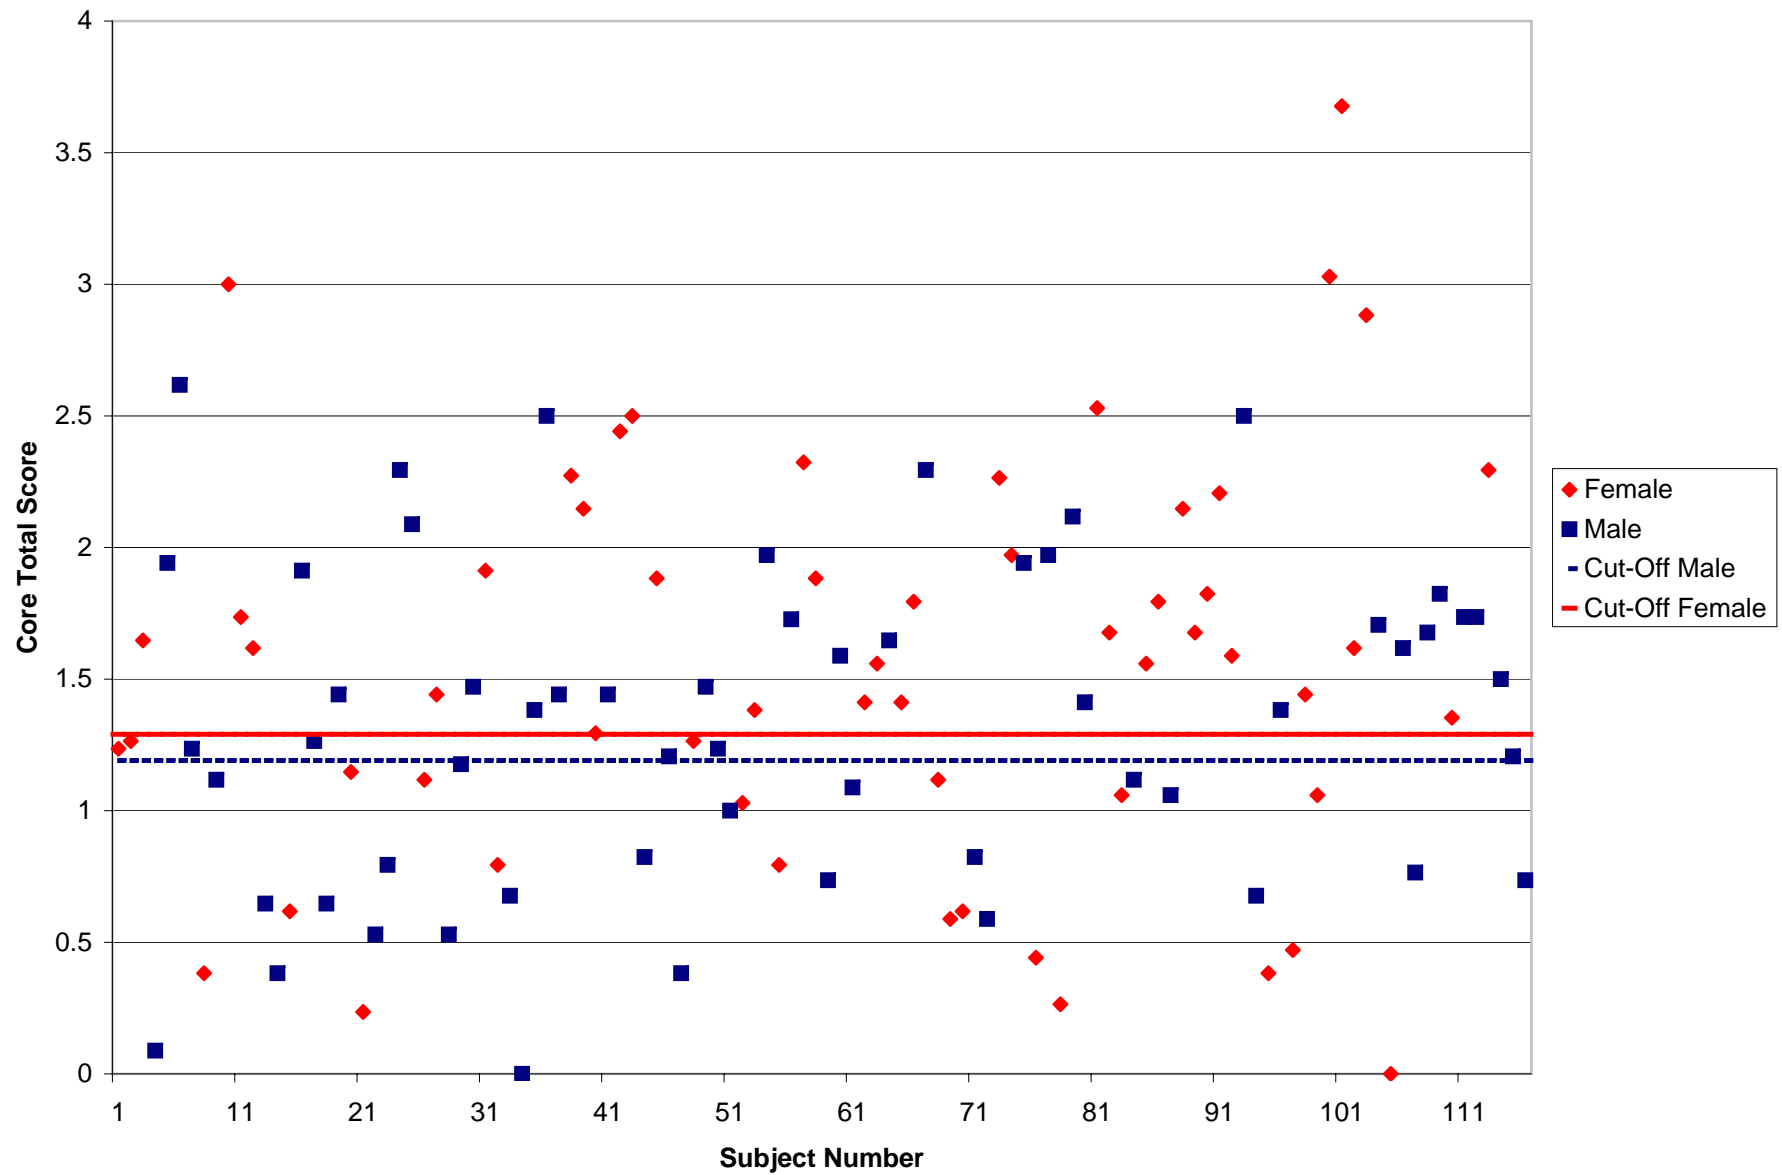

Supplement: MOESM4 [file 9599228]
